# Supplementary material
Source: publisher figshare collection journal article supplement (https://gsapubs.figshare.com/ndownloader/files/23304347)
Supplement: Supplementary file 1 [file 23304347]

TABLE A2. MAJOR ELEMENT COMPOSITION OF CLINOPYROXENE

| Sample                         | 99-9  |       | BM99X1 |       | E-1   |       | 99-4  |       | 99-5  |       | 99-8  |  |
|--------------------------------|-------|-------|--------|-------|-------|-------|-------|-------|-------|-------|-------|--|
| Type                           | H     | M     | H      | M     | H     | M     | H     | M     | H     | H     | M     |  |
| SiO <sub>2</sub>               | 50.75 | 51.27 | 51.85  | 51.73 | 51.47 | 51.84 | 51.03 | 51.42 | 51.30 | 51.16 | 51.76 |  |
| TiO <sub>2</sub>               | 0.22  | 0.21  | 0.61   | 0.59  | 0.43  | 0.42  | 0.73  | 0.79  | 0.80  | 0.16  | 0.15  |  |
| Al <sub>2</sub> O <sub>3</sub> | 9.28  | 8.77  | 7.96   | 7.75  | 6.33  | 6.42  | 7.14  | 7.51  | 4.87  | 6.41  | 6.58  |  |
| Cr <sub>2</sub> O <sub>3</sub> | 0.14  | 0.13  | 0.09   | 0.08  | 0.24  | 0.26  | 0.30  | 0.30  | 0.32  | 0.11  | 0.11  |  |
| FeO                            | 4.55  | 4.52  | 4.76   | 4.83  | 3.58  | 3.60  | 3.32  | 3.29  | 6.67  | 4.37  | 3.91  |  |
| MnO                            | 0.09  |       | 0.08   | 0.08  | 0.06  | 0.06  | 0.07  | 0.09  | 0.13  | 0.07  | 0.07  |  |
| MgO                            | 12.03 | 12.23 | 13.35  | 13.43 | 14.88 | 14.63 | 14.66 | 14.28 | 14.24 | 14.68 | 14.38 |  |
| CaO                            | 21.44 | 21.36 | 20.66  | 20.70 | 21.70 | 22.05 | 20.85 | 20.92 | 20.29 | 21.50 | 21.90 |  |
| Na <sub>2</sub> O              | 1.62  | 1.57  | 1.85   | 1.83  | 1.17  | 1.19  | 1.51  | 1.58  | 1.26  | 1.27  | 1.31  |  |
| NiO                            | 0.07  | b.d.  | b.d.   | b.d.  | 0.07  | 0.07  | b.d.  | b.d.  | 0.08  | b.d.  | b.d.  |  |
| Total                          | 100.1 | 100.1 | 101.2  | 101.0 | 99.9  | 100.5 | 99.6  | 100.2 | 99.9  | 99.7  | 100.2 |  |
| Mg#                            | 82.6  | 83.0  | 83.5   | 83.4  | 88.2  | 88.0  | 88.8  | 88.7  | 79.3  | 85.8  | 86.9  |  |
| En                             | 0.40  | 0.41  | 0.44   | 0.44  | 0.47  | 0.46  | 0.48  | 0.46  | 0.45  | 0.47  | 0.46  |  |
| Fs                             | 0.08  | 0.08  | 0.07   | 0.06  | 0.04  | 0.04  | 0.03  | 0.05  | 0.08  | 0.03  | 0.04  |  |
| Wo                             | 0.52  | 0.51  | 0.49   | 0.49  | 0.49  | 0.50  | 0.49  | 0.49  | 0.46  | 0.50  | 0.50  |  |

Continued

| Sample                         | 99-2  |       | BM99X2 |       | 90-3  |       | 96-3  | C-1   | 96-2  | 99-7  | 99-6  | 85-1  |
|--------------------------------|-------|-------|--------|-------|-------|-------|-------|-------|-------|-------|-------|-------|
| Type                           | H     | M     | H      | M     | H     | M     | M     | M     | M     | M     | M     | M     |
| SiO <sub>2</sub>               | 50.91 | 51.25 | 51.42  | 51.42 | 51.99 | 51.73 | 51.37 | 52.08 | 51.17 | 51.56 | 51.33 | 50.98 |
| TiO <sub>2</sub>               | 0.40  | 0.40  | 0.50   | 0.56  | 0.48  | 0.49  | 1.02  | 0.45  | 0.37  | 0.45  | 0.36  | 0.57  |
| Al <sub>2</sub> O <sub>3</sub> | 6.43  | 6.34  | 6.89   | 7.34  | 5.33  | 5.41  | 6.20  | 5.02  | 6.62  | 5.03  | 6.75  | 7.51  |
| Cr <sub>2</sub> O <sub>3</sub> | 0.19  | 0.22  | 0.07   | 0.10  | 0.09  | 0.09  | 0.11  | 0.07  | 0.28  | 0.08  | 0.17  | 0.11  |
| FeO                            | 4.56  | 4.43  | 6.15   | 5.86  | 4.71  | 4.69  | 5.00  | 5.14  | 5.12  | 4.90  | 3.25  | 5.99  |
| MnO                            | 0.08  | 0.08  | 0.10   | 0.09  | 0.10  | 0.10  | 0.09  | 0.10  | 0.09  | 0.11  | 0.07  | 0.08  |
| MgO                            | 14.96 | 14.93 | 13.52  | 13.27 | 15.00 | 14.78 | 14.75 | 14.62 | 14.47 | 15.29 | 15.40 | 13.17 |
| CaO                            | 20.96 | 21.01 | 20.49  | 20.70 | 21.72 | 22.00 | 21.06 | 21.82 | 20.34 | 22.12 | 21.56 | 20.84 |
| Na <sub>2</sub> O              | 1.41  | 1.43  | 1.60   | 1.63  | 0.84  | 0.85  | 1.16  | 0.86  | 1.55  | 0.76  | 1.28  | 1.63  |
| NiO                            | b.d.  | b.d.  | b.d.   | 0.06  | b.d.  | b.d.  | 0.09  | b.d.  | 0.08  | b.d.  | 0.08  | 0.08  |
| Total                          | 99.9  | 100.1 | 100.8  | 101.0 | 100.3 | 100.0 | 100.8 | 100.1 | 100.1 | 100.2 | 100.2 | 100.9 |
| Mg#                            | 85.5  | 85.8  | 79.8   | 80.3  | 85.1  | 85.0  | 84.1  | 83.7  | 83.6  | 84.9  | 89.5  | 79.8  |
| En                             | 0.49  | 0.48  | 0.44   | 0.43  | 0.46  | 0.45  | 0.46  | 0.44  | 0.48  | 0.47  | 0.49  | 0.44  |
| Fs                             | 0.02  | 0.03  | 0.07   | 0.08  | 0.07  | 0.06  | 0.06  | 0.08  | 0.04  | 0.05  | 0.01  | 0.07  |
| Wo                             | 0.49  | 0.49  | 0.48   | 0.49  | 0.47  | 0.48  | 0.47  | 0.48  | 0.48  | 0.48  | 0.50  | 0.50  |

Note: H, host Cpx; M, recrystallized Cpx.

b.d.= below detection limit.

TABLE A3. MAJOR ELEMENT COMPOSITION OF ORTHOPYROXENE

| Sample No.                     | E-1   | 99-4  |       |       |       | 99-5  |       | 99-2  | 90-3  |       | 96-3  | 96-2  | 99-7  | C-1   |
|--------------------------------|-------|-------|-------|-------|-------|-------|-------|-------|-------|-------|-------|-------|-------|-------|
| Type                           | E     | M     | E     | M     | H     | E     | E     | M     | E     | M     | M     | M     | M     | M     |
| SiO <sub>2</sub>               | 55.23 | 54.44 | 54.55 | 54.77 | 55.02 | 53.32 | 53.49 | 53.35 | 54.44 | 53.80 | 54.92 | 53.30 | 53.90 | 53.98 |
| TiO <sub>2</sub>               | 0.07  | 0.08  | 0.11  | 0.10  | 0.12  | 0.25  | 0.06  | 0.05  | 0.11  | 0.09  | 0.22  | 0.08  | 0.11  | 0.10  |
| Al <sub>2</sub> O <sub>3</sub> | 4.61  | 4.60  | 4.61  | 4.72  | 4.79  | 3.69  | 4.70  | 4.60  | 4.05  | 4.01  | 4.12  | 4.63  | 4.10  | 4.11  |
| Cr <sub>2</sub> O <sub>3</sub> | 0.12  | 0.12  | 0.14  | 0.14  | 0.15  | 0.16  | 0.10  | 0.11  | 0.07  | 0.06  | 0.06  | 0.14  | b.d.  | 0.06  |
| FeO                            | 9.41  | 9.43  | 8.44  | 9.18  | 8.57  | 15.38 | 10.51 | 10.57 | 11.64 | 11.59 | 11.69 | 11.60 | 12.05 | 11.86 |
| MnO                            | 0.12  | 0.09  | 0.17  | 0.19  | 0.19  | 0.25  | 0.15  | 0.16  | 0.21  | 0.17  | 0.15  | 0.16  | 0.21  | 0.16  |
| MgO                            | 31.15 | 30.55 | 31.25 | 31.35 | 31.73 | 26.63 | 30.58 | 30.86 | 28.57 | 29.17 | 29.25 | 29.70 | 29.43 | 28.66 |
| CaO                            | 0.55  | 0.60  | 0.61  | 0.52  | 0.51  | 0.86  | 0.67  | 0.68  | 0.72  | 0.69  | 0.77  | 0.75  | 0.67  | 0.68  |
| Na <sub>2</sub> O              | 0.05  | b.d.  | 0.08  | 0.10  | 0.07  | 0.11  | 0.09  | 0.08  | b.d.  | b.d.  | 0.08  | 0.09  | 0.05  | 0.05  |
| NiO                            | 0.12  | 0.13  | b.d.  | b.d.  | b.d.  | 0.10  | 0.11  | 0.11  | b.d.  | b.d.  | 0.14  | 0.12  | 0.07  | 0.08  |
| Total                          | 101.4 | 100.0 | 100.0 | 101.1 | 101.1 | 100.7 | 100.5 | 100.5 | 99.8  | 99.6  | 101.4 | 100.6 | 100.5 | 99.7  |
| Mg#                            | 85.6  | 85.4  | 87.0  | 86.0  | 87.0  | 75.7  | 84.0  | 84.0  | 81.5  | 81.9  | 81.8  | 82.2  | 81.47 | 81.3  |
| En                             | 0.84  | 0.84  | 0.86  | 0.86  | 0.86  | 0.75  | 0.86  | 0.87  | 0.80  | 0.81  | 0.80  | 0.84  | 0.82  | 0.80  |
| Fs                             | 0.14  | 0.15  | 0.13  | 0.13  | 0.13  | 0.23  | 0.13  | 0.12  | 0.18  | 0.18  | 0.18  | 0.15  | 0.17  | 0.19  |
| Wo                             | 0.01  | 0.01  | 0.01  | 0.01  | 0.01  | 0.02  | 0.01  | 0.01  | 0.01  | 0.01  | 0.02  | 0.02  | 0.01  | 0.01  |

Note: E, exsolved Opx; M, recrystallized Opx; H, host Opx.

b.d.= below detection limit.

TABLE A4. MAJOR ELEMENT COMPOSITION OF GARNET

| Sample No.                     | 99-9  |       | BM99X1 |       | E-1   |       | 99-4  |       |       | 99-5  |       | 99-8  |       | 99-2  |       |  |
|--------------------------------|-------|-------|--------|-------|-------|-------|-------|-------|-------|-------|-------|-------|-------|-------|-------|--|
| Type                           | E1    | M     | E1     | M     | E1    | C     | E1    | E2    | M     | E1    | E1    | M     | E1    | M     | C     |  |
| SiO <sub>2</sub>               | 41.29 | 41.37 | 40.76  | 40.52 | 41.85 | 41.59 | 40.87 | 40.86 | 41.04 | 40.57 | 40.99 | 41.15 | 41.42 | 41.46 | 41.34 |  |
| TiO <sub>2</sub>               | 0.03  | 0.03  | 0.06   | 0.05  | 0.04  | 0.04  | 0.07  | 0.08  | 0.07  | 0.17  |       |       | 0.04  | 0.07  | 0.04  |  |
| Al <sub>2</sub> O <sub>3</sub> | 22.19 | 22.30 | 23.12  | 23.26 | 23.31 | 23.60 | 23.50 | 23.50 | 23.52 | 22.64 | 23.90 | 22.44 | 23.76 | 23.54 | 23.91 |  |
| Cr <sub>2</sub> O <sub>3</sub> | 0.09  | 0.10  | 0.09   | 0.08  | 0.27  | 0.24  | 0.24  | 0.25  | 0.25  | 0.44  | 0.10  | 0.09  | 0.21  | 0.23  | 0.26  |  |
| FeO                            | 14.73 | 14.72 | 15.06  | 15.47 | 10.87 | 11.70 | 10.73 | 10.52 | 10.82 | 16.56 | 12.89 | 12.50 | 12.25 | 12.55 | 11.88 |  |
| MnO                            | 0.47  | 0.47  | 0.49   | 0.50  | 0.25  | 0.30  | 0.50  | 0.51  | 0.52  | 0.57  | 0.42  | 0.40  | 0.42  | 0.42  | 0.42  |  |
| MgO                            | 13.09 | 12.91 | 15.15  | 15.19 | 17.84 | 18.63 | 19.07 | 19.25 | 18.99 | 14.64 | 16.58 | 15.83 | 17.76 | 18.29 | 17.74 |  |
| CaO                            | 8.13  | 8.14  | 6.32   | 6.10  | 5.80  | 5.42  | 4.28  | 4.20  | 4.24  | 5.79  | 6.09  | 6.43  | 5.46  | 5.39  | 5.46  |  |
| Na <sub>2</sub> O              | b.d.  | b.d.  | 0.25   | 0.03  | 0.24  | b.d.  | b.d.  | b.d.  | b.d.  | 0.02  | b.d.  | 0.28  | b.d.  | b.d.  | b.d.  |  |
| Total                          | 100.0 | 100.0 | 101.3  | 101.2 | 100.4 | 101.5 | 99.3  | 99.2  | 99.5  | 101.4 | 100.9 | 99.1  | 101.3 | 102.0 | 101.0 |  |
| Mg#                            | 61.5  | 61.2  | 64.4   | 63.9  | 74.7  | 74.1  | 76.2  | 76.7  | 76.0  | 61.4  | 69.8  | 69.5  | 72.3  | 72.4  | 72.9  |  |
| Spessartine                    | 0.01  | 0.01  | 0.01   | 0.01  | 0.01  | 0.01  | 0.01  | 0.01  | 0.01  | 0.01  | 0.01  | 0.01  | 0.01  | 0.01  | 0.01  |  |
| Pyrope                         | 0.47  | 0.49  | 0.56   | 0.57  | 0.66  | 0.68  | 0.71  | 0.71  | 0.70  | 0.55  | 0.61  | 0.60  | 0.65  | 0.67  | 0.65  |  |
| Almandine                      | 0.31  | 0.31  | 0.25   | 0.27  | 0.20  | 0.19  | 0.19  | 0.18  | 0.19  | 0.30  | 0.23  | 0.23  | 0.22  | 0.20  | 0.21  |  |
| Grossular                      | 0.20  | 0.19  | 0.16   | 0.14  | 0.14  | 0.11  | 0.10  | 0.10  | 0.10  | 0.11  | 0.16  | 0.16  | 0.13  | 0.11  | 0.14  |  |

| Sample No.                     | BM99X2 |       |       | 90-3  |       | C-1   |       | 99-7  | 96-3  | 96-2  | 99-6  | 85-1  |
|--------------------------------|--------|-------|-------|-------|-------|-------|-------|-------|-------|-------|-------|-------|
| Type                           | E1     | M     | C     | E1    | M     | E1    | M     | M     | C     | C     | C     | C     |
| SiO <sub>2</sub>               | 40.16  | 40.02 | 40.39 | 40.75 | 41.34 | 40.86 | 41.04 | 40.66 | 41.70 | 41.17 | 41.80 | 39.93 |
| TiO <sub>2</sub>               | 0.07   | 0.07  | 0.07  | 0.08  | 0.09  | 0.05  | 0.06  | 0.05  | 0.14  | 0.08  | 0.04  | 0.07  |
| Al <sub>2</sub> O <sub>3</sub> | 23.02  | 22.93 | 22.98 | 23.30 | 22.73 | 23.09 | 23.03 | 23.24 | 22.97 | 23.22 | 24.24 | 22.74 |
| Cr <sub>2</sub> O <sub>3</sub> | 0.06   | 0.11  | 0.10  | 0.17  | 0.13  | 0.10  | 0.12  | 0.08  | 0.12  | 0.45  | 0.18  | 0.11  |
| FeO                            | 16.51  | 16.33 | 16.15 | 13.90 | 13.88 | 14.05 | 14.69 | 13.95 | 13.67 | 13.29 | 9.34  | 16.43 |
| MnO                            | 0.47   | 0.43  | 0.44  | 0.56  | 0.56  | 0.54  | 0.53  | 0.60  | 0.42  | 0.41  | 0.31  | 0.49  |
| MgO                            | 14.42  | 14.32 | 14.12 | 15.90 | 16.37 | 16.04 | 15.65 | 16.68 | 15.86 | 17.40 | 19.63 | 13.78 |
| CaO                            | 6.62   | 6.99  | 7.21  | 5.01  | 5.23  | 5.92  | 5.86  | 5.85  | 5.61  | 5.30  | 5.47  | 7.23  |
| Na <sub>2</sub> O              | b.d.   | b.d.  | 0.02  | 0.39  | 0.35  | 0.02  | 0.07  | b.d.  | b.d.  | b.d.  | b.d.  | b.d.  |
| Total                          | 101.3  | 101.2 | 101.5 | 100.1 | 100.7 | 100.7 | 101.0 | 101.1 | 100.5 | 101.3 | 101.0 | 100.8 |
| Mg#                            | 61.1   | 61.2  | 61.1  | 67.3  | 68.0  | 64.1  | 65.7  | 68.3  | 67.6  | 70.2  | 79.1  | 60.2  |
| Spessartine                    | 0.01   | 0.01  | 0.01  | 0.01  | 0.01  | 0.01  | 0.01  | 0.01  | 0.01  | 0.01  | 0.01  | 0.01  |
| Pyrope                         | 0.54   | 0.54  | 0.53  | 0.59  | 0.61  | 0.60  | 0.58  | 0.62  | 0.59  | 0.64  | 0.71  | 0.52  |

|           |      |      |      |      |      |      |      |      |      |      |      |      |
|-----------|------|------|------|------|------|------|------|------|------|------|------|------|
| Almandine | 0.28 | 0.27 | 0.28 | 0.24 | 0.24 | 0.25 | 0.27 | 0.22 | 0.29 | 0.23 | 0.16 | 0.29 |
| Grossular | 0.15 | 0.15 | 0.16 | 0.13 | 0.13 | 0.13 | 0.13 | 0.12 | 0.13 | 0.10 | 0.14 | 0.16 |

---

*Note:* E1, exsolved Gt in Cpx; E2, exsolved Gt in Opx; M, recrystallized Gt; C, coarse garnet.

b.d.= below detection limit.

---

TABLE A5. MAJOR ELEMENT COMPOSITIONS OF SPINEL AND OLIVINE

| Mineral                        | Sp      |       |        |        |       |       |       |        |        |         |       |       |       |       | Ol    |       |       |       |
|--------------------------------|---------|-------|--------|--------|-------|-------|-------|--------|--------|---------|-------|-------|-------|-------|-------|-------|-------|-------|
| Sample No.                     | C-1     |       | E-1    | 96-2   |       |       | 99-7  |        |        |         |       | 99-6  | 90-3  |       | C-1   | 90-3  | 96-2  | 99-7  |
| Type                           | Type II | I     | Type I | Type I | I     | AS    | AS    | Type I | Type I | Type II | I     | I     | E     | I     | I     | I     | I     | I     |
| SiO <sub>2</sub>               | 0.06    | 0.06  | 0.04   | 0.07   | 0.06  | 0.07  | 0.04  | 0.06   | b.d.   | 0.10    | 0.08  | 0.09  | 0.04  | 0.05  | 39.73 | 39.78 | 39.54 | 39.18 |
| TiO <sub>2</sub>               | 0.14    | 0.10  | 0.05   | 0.34   | 0.10  | 0.08  | 0.12  | 0.21   | 0.12   | 0.13    | 0.11  | 0.05  | 0.12  | 0.10  | b.d.  | b.d.  | b.d.  | b.d.  |
| Al <sub>2</sub> O <sub>3</sub> | 62.10   | 62.61 | 61.28  | 47.24  | 59.71 | 57.71 | 62.54 | 59.02  | 62.48  | 61.87   | 62.65 | 64.56 | 61.95 | 60.98 | b.d.  | 0.04  | 0.03  | 0.03  |
| Cr <sub>2</sub> O <sub>3</sub> | 1.42    | 1.62  | 4.23   | 14.24  | 3.74  | 5.55  | 1.11  | 3.45   | 2.37   | 1.45    | 1.50  | 1.94  | 2.27  | 3.59  | b.d.  | b.d.  | b.d.  | 0.04  |
| FeO                            | 18.07   | 17.78 | 13.82  | 22.04  | 17.82 | 18.30 | 16.98 | 19.40  | 17.73  | 17.57   | 17.27 | 11.34 | 17.41 | 17.24 | 20.53 | 19.52 | 18.05 | 20.13 |
| MnO                            | 0.10    | 0.08  | 0.06   | 0.11   | 0.08  | 0.10  | 0.10  | 0.13   | 0.12   | 0.09    | 0.10  | 0.07  | 0.10  | 0.11  | 0.21  | 0.21  | 0.15  | 0.20  |
| MgO                            | 17.16   | 16.84 | 19.12  | 14.72  | 17.26 | 16.73 | 17.95 | 17.20  | 18.16  | 17.82   | 18.00 | 20.49 | 17.15 | 16.78 | 39.23 | 41.93 | 41.59 | 41.31 |
| CaO                            | b.d.    | b.d.  | b.d.   | 0.02   | b.d.  | b.d.  | b.d.  | b.d.   | b.d.   | b.d.    | b.d.  | 0.05  | 0.04  | 0.06  | 0.07  | 0.05  | 0.07  | 0.06  |
| ZnO                            | 0.19    | 0.17  | 0.36   | 0.18   | 0.23  | 0.24  | 0.12  | 0.15   | 0.19   | 0.19    | 0.18  | 0.13  | 0.17  | 0.25  | b.d.  | b.d.  | b.d.  | b.d.  |
| V <sub>2</sub> O <sub>3</sub>  | 0.14    | 0.13  | 0.06   | 0.09   | 0.06  | b.d.  | 0.11  | 0.13   | 0.11   | 0.11    | 0.10  | 0.05  | 0.10  | 0.15  | b.d.  | b.d.  | b.d.  | b.d.  |
| NiO                            | 0.37    | 0.39  | 0.65   | 0.42   | 0.59  | 0.51  | 0.31  | 0.33   | 0.34   | 0.37    | 0.30  | 0.65  | 0.27  | 0.32  | 0.27  | 0.22  | 0.48  | 0.27  |
| Total                          | 99.7    | 99.8  | 99.6   | 99.5   | 99.6  | 99.3  | 99.3  | 100.0  | 101.6  | 99.7    | 100.3 | 99.3  | 99.6  | 99.6  | 100.0 | 101.7 | 99.9  | 101.2 |
| Mg#                            | 63.1    | 63.0  | 71.4   | 54.6   | 63.6  | 62.2  | 65.6  | 61.5   | 64.8   | 64.6    | 65.2  | 76.5  | 63.9  | 63.7  | 77.5  | 79.5  | 80.6  | 78.7  |
| Cr#                            | 1.51    | 1.71  | 4.42   | 16.83  | 4.04  | 6.06  | 1.18  | 3.77   | 2.48   | 1.55    | 1.58  | 1.97  | 2.40  | 3.80  |       |       |       |       |

Note: Type I, garnet-rimmed spinel without other phases; Type II, garnet-rimmed spinel with olivine and orthopyroxene; AS, amphibole-rimmed spinel; E, exsolved spinel; I, interstitial.

b.d.= below detection limit.

TABLE A6. MAJOR ELEMENT COMPOSITIONS OF PHLOGOPITE AND AMPHIBOLE

| Sample                         | 96-3  | BM99X1 |       | 99-4  |       | 99-5  |       | 99-6  | 96-2  | E-1   | C-1   | 99-7  |       | 90-3  |
|--------------------------------|-------|--------|-------|-------|-------|-------|-------|-------|-------|-------|-------|-------|-------|-------|
| Mineral                        | Phl   | Amp2   | Amp1  | Amp2  | Amp1  | Amp2  | Amp1  | Amp2  | Amp2  | Amp1  | Amp1  | Amp2  | Amp2  | Amp1  |
| SiO <sub>2</sub>               | 36.26 | 41.94  | 41.61 | 42.20 | 41.91 | 42.66 | 40.90 | 42.08 | 41.86 | 41.96 | 42.77 | 42.64 | 41.95 | 41.63 |
| TiO <sub>2</sub>               | 6.50  | 3.97   | 2.55  | 2.40  | 2.56  | 0.84  | 2.24  | 1.47  | 1.10  | 1.63  | 1.91  | 1.76  | 1.68  | 1.70  |
| Al <sub>2</sub> O <sub>3</sub> | 15.49 | 13.36  | 16.04 | 15.00 | 15.55 | 15.77 | 14.19 | 16.21 | 15.72 | 15.69 | 14.37 | 14.44 | 15.65 | 15.40 |
| Cr <sub>2</sub> O <sub>3</sub> | 0.14  | 0.13   | 0.12  | 0.12  | 0.43  | 0.35  | 0.42  | 0.24  | 0.32  | 0.35  | 0.13  | 0.12  | 0.11  | 0.17  |
| FeO                            | 7.90  | 6.97   | 7.62  | 7.65  | 5.03  | 5.34  | 9.72  | 4.65  | 7.04  | 5.33  | 7.18  | 7.12  | 6.82  | 6.75  |
| MnO                            | 0.04  | 0.05   | 0.07  | 0.08  | 0.07  | 0.10  | 0.10  | 0.04  | 0.06  | 0.05  | 0.09  | 0.08  | 0.08  | 0.08  |
| MgO                            | 16.61 | 14.48  | 14.98 | 14.15 | 16.71 | 16.88 | 14.05 | 17.08 | 15.93 | 16.70 | 15.62 | 15.59 | 16.50 | 16.21 |
| CaO                            | 0.05  | 11.41  | 10.77 | 10.90 | 11.00 | 10.98 | 10.42 | 11.03 | 10.56 | 11.04 | 11.22 | 11.05 | 11.34 | 11.23 |
| Na <sub>2</sub> O              | 0.51  | 2.50   | 3.53  | 3.39  | 3.93  | 3.44  | 3.21  | 3.36  | 3.13  | 3.58  | 3.45  | 3.48  | 3.28  | 3.46  |
| K <sub>2</sub> O               | 8.45  | 1.81   | 0.50  | 0.61  | 0.07  | 0.90  | 1.03  | 0.57  | 1.32  | 0.10  | 0.20  | 0.16  | 0.42  | 0.14  |
| NiO                            | 0.30  | 0.16   | 0.11  | b.d.  | b.d.  | b.d.  | b.d.  | 0.14  | 0.15  | 0.14  | b.d.  | 0.10  | 0.11  | 0.12  |
| Cl                             | 0.27  | 0.18   | 0.15  | 0.20  | 0.04  | 0.04  | 0.04  | 0.07  | 0.07  | b.d.  | b.d.  | b.d.  | 0.06  | 0.03  |
| F                              | 0.07  | b.d.   | 0.06  | 0.09  | b.d.  | b.d.  | 0.07  | b.d.  | b.d.  | 0.13  | 0.31  | 0.29  | 0.18  | 0.22  |
| Total                          | 92.5  | 97.0   | 98.0  | 96.8  | 97.3  | 97.3  | 96.4  | 96.9  | 97.2  | 96.6  | 97.2  | 96.7  | 98.1  | 97.0  |
| Mg#                            | 79.1  | 78.9   | 78.0  | 76.9  | 85.7  | 85.1  | 72.2  | 86.9  | 80.3  | 84.9  | 79.7  | 79.8  | 81.3  | 81.2  |

Note: Phl, phlogopite; Amp1, amphibole in lamellar zone; Amp2, amphibole in recrystallized zone.

b.d.= below detection limit.

Table A7. IN SITU TRACE ELEMENT ANALYSES OF CLINOPYROXENE

| Sample |      |      | BM99X1 |        |        |        |        | E-1    |        |        | 99-4   |        |        | 99-5   |        |        | 99-8 |       |       | 99-2  |        |        | BM99X2 |       |        | 90-3   |        | 96-3   |        | C-1   |      | 96-2 |  | 99-7 |  | 99-6 |  | 85-1 |  |
|--------|------|------|--------|--------|--------|--------|--------|--------|--------|--------|--------|--------|--------|--------|--------|--------|------|-------|-------|-------|--------|--------|--------|-------|--------|--------|--------|--------|--------|-------|------|------|--|------|--|------|--|------|--|
| Type   | M    | H    | H      | M      | H      | M      | Inc    | H      | M      | H      | H      | M      | H      | M      | Inc    | H      | M    | Inc   | H     | M     | M      | Inc    | M      | M     | Inc    | M      | M      | Inc    | M      | M     | M    |      |  |      |  |      |  |      |  |
| Ti     | 1378 | 1266 |        | 3611   | 3322   | 2478   | 2632   | 2730   | 4066   | 4259   | 4539   | 992    | 962    | 2332   | 2203   | 2774   |      | 2904  | 3484  | 4365  | 2881   | 2747   | 5731   | 5479  | 2888   | 2480   | 1902   | 2593   | 2450   | 3304  |      |      |  |      |  |      |  |      |  |
| Rb     | b.d. | b.d. |        | 0.12   | 0.11   | b.d.   | b.d.   | b.d.   | 0.04   | b.d.   | b.d.   | b.d.   | 0.01   | b.d.   | b.d.   | b.d.   | b.d. | b.d.  | b.d.  | b.d.  | 0.17   | 0.11   | b.d.   | b.d.  | b.d.   | 0.13   | b.d.   | b.d.   | b.d.   | b.d.  | 0.03 |      |  |      |  |      |  |      |  |
| Sr     | 9.24 | 7.44 |        | 113.92 | 129.28 | 125.60 | 124.57 | 129.90 | 149.21 | 147.34 | 108.63 | 131.90 | 134.75 | 115.32 | 114.47 | 113.22 |      | 13.37 | 13.50 | 15.02 | 128.12 | 125.44 | 92.05  | 90.62 | 140.39 | 146.20 | 149.61 | 171.72 | 136.76 | 58.72 |      |      |  |      |  |      |  |      |  |
| Y      | 1.17 | 1.13 |        | 5.05   | 5.24   | 1.68   | 1.99   | 1.69   | 5.07   | 5.62   | 6.54   | 0.77   | 0.78   | 1.27   | 1.29   | 1.31   |      | 1.16  | 1.61  | 3.12  | 8.88   | 7.94   | 3.15   | 3.34  | 6.32   | 1.36   | 1.46   | 7.73   | 0.72   | 3.50  |      |      |  |      |  |      |  |      |  |
| Zr     | 1.05 | 0.99 |        | 16.12  | 15.28  | 16.44  | 19.90  | 16.97  | 25.35  | 26.01  | 30.48  | 6.90   | 7.33   | 5.55   | 5.66   | 7.31   |      | 2.26  | 3.18  | 4.77  | 31.39  | 30.69  | 44.78  | 41.23 | 24.27  | 6.99   | 6.87   | 25.57  | 14.27  | 10.93 |      |      |  |      |  |      |  |      |  |
| Nb     | b.d. | 0.01 |        | 0.22   | 0.24   | 0.08   | 0.06   | 0.08   | 0.20   | 0.17   | 0.07   | 0.92   | 1.20   | 0.14   | 0.24   | 0.14   |      | 0.12  | 0.15  | 0.18  | 0.04   | 0.04   | 0.74   | 0.66  | 0.03   | 0.14   | 0.19   | 0.11   | 0.55   | 1.26  |      |      |  |      |  |      |  |      |  |
| Ba     | b.d. | 0.03 |        | 0.24   | 0.46   | 0.09   | 0.07   | 0.07   | 0.09   | 0.05   | 0.06   | 0.32   | 0.10   | 0.04   | 0.04   | 0.07   |      | 0.03  | 0.01  | 0.05  | 0.88   | 0.30   | 0.13   | 0.13  | 0.23   | 0.27   | 0.03   | 0.27   | 0.12   | 0.31  |      |      |  |      |  |      |  |      |  |
| La     | 0.03 | 0.02 |        | 9.65   | 9.87   | 4.03   | 3.72   | 4.17   | 4.98   | 4.66   | 2.61   | 4.02   | 4.34   | 1.66   | 1.81   | 1.51   |      | 0.53  | 0.55  | 0.65  | 11.94  | 11.86  | 4.23   | 5.97  | 14.04  | 2.92   | 3.76   | 17.76  | 2.24   | 4.39  |      |      |  |      |  |      |  |      |  |
| Ce     | 0.39 | 0.35 |        | 18.40  | 19.25  | 16.17  | 15.82  | 16.82  | 11.73  | 10.50  | 6.38   | 11.12  | 12.35  | 3.45   | 3.67   | 3.02   |      | 0.71  | 0.77  | 0.79  | 45.68  | 45.44  | 10.01  | 12.13 | 47.60  | 3.79   | 4.76   | 58.78  | 4.43   | 7.27  |      |      |  |      |  |      |  |      |  |
| Pr     | 0.13 | 0.11 |        | 2.11   | 2.14   | 3.09   | 3.03   | 3.18   | 1.72   | 1.50   | 1.13   | 1.63   | 1.82   | 0.50   | 0.49   | 0.42   |      | 0.07  | 0.07  | 0.08  | 8.32   | 8.29   | 1.40   | 1.54  | 8.34   | 0.46   | 0.53   | 9.92   | 0.60   | 0.75  |      |      |  |      |  |      |  |      |  |
| Nd     | 0.88 | 0.73 |        | 8.21   | 8.85   | 14.89  | 15.23  | 15.65  | 8.29   | 7.33   | 6.69   | 6.58   | 7.48   | 2.46   | 2.44   | 2.25   |      | 0.53  | 0.59  | 0.67  | 40.81  | 40.89  | 6.46   | 6.93  | 40.87  | 2.31   | 2.23   | 48.15  | 3.03   | 2.77  |      |      |  |      |  |      |  |      |  |
| Sm     | 0.25 | 0.22 |        | 1.95   | 1.94   | 2.68   | 2.97   | 2.91   | 2.32   | 2.12   | 2.23   | 1.11   | 1.32   | 0.77   | 0.68   | 0.81   |      | 0.57  | 0.65  | 0.65  | 7.38   | 7.44   | 2.14   | 1.90  | 7.68   | 0.71   | 0.62   | 8.77   | 0.81   | 0.82  |      |      |  |      |  |      |  |      |  |
| Eu     | 0.13 | 0.12 |        | 0.65   | 0.66   | 0.71   | 0.69   | 0.66   | 0.91   | 0.89   | 0.79   | 0.33   | 0.40   | 0.25   | 0.29   | 0.29   |      | 0.25  | 0.29  | 0.31  | 1.72   | 1.70   | 0.70   | 0.72  | 1.71   | 0.31   | 0.27   | 1.99   | 0.33   | 0.32  |      |      |  |      |  |      |  |      |  |
| Gd     | 0.39 | 0.42 |        | 2.02   | 2.01   | 1.49   | 1.35   | 1.46   | 2.31   | 2.20   | 2.43   | 0.68   | 0.80   | 0.61   | 0.70   | 0.57   |      | 0.78  | 0.96  | 1.19  | 4.74   | 4.65   | 2.07   | 2.03  | 4.60   | 0.64   | 0.66   | 5.22   | 0.64   | 1.22  |      |      |  |      |  |      |  |      |  |
| Tb     | 0.05 | 0.06 |        | 0.27   | 0.27   | 0.13   | 0.15   | 0.14   | 0.30   | 0.31   | 0.33   | 0.06   | 0.07   | 0.08   | 0.09   | 0.07   |      | 0.10  | 0.13  | 0.17  | 0.51   | 0.49   | 0.24   | 0.25  | 0.47   | 0.08   | 0.09   | 0.52   | 0.07   | 0.18  |      |      |  |      |  |      |  |      |  |
| Dy     | 0.38 | 0.33 |        | 1.44   | 1.42   | 0.57   | 0.61   | 0.57   | 1.78   | 1.67   | 1.73   | 0.27   | 0.27   | 0.40   | 0.42   | 0.44   |      | 0.44  | 0.60  | 0.90  | 2.34   | 2.29   | 1.08   | 0.95  | 1.99   | 0.41   | 0.41   | 2.39   | 0.30   | 0.93  |      |      |  |      |  |      |  |      |  |
| Ho     | 0.06 | 0.04 |        | 0.22   | 0.24   | 0.06   | 0.09   | 0.07   | 0.25   | 0.26   | 0.28   | 0.03   | 0.03   | 0.05   | 0.06   | 0.07   |      | 0.05  | 0.08  | 0.14  | 0.37   | 0.35   | 0.14   | 0.13  | 0.27   | 0.06   | 0.07   | 0.33   | 0.03   | 0.15  |      |      |  |      |  |      |  |      |  |
| Er     | 0.07 | 0.09 |        | 0.45   | 0.43   | 0.12   | 0.15   | 0.11   | 0.50   | 0.52   | 0.56   | 0.06   | 0.06   | 0.10   | 0.10   | 0.11   |      | 0.08  | 0.10  | 0.29  | 0.73   | 0.68   | 0.24   | 0.27  | 0.48   | 0.12   | 0.14   | 0.61   | 0.05   | 0.28  |      |      |  |      |  |      |  |      |  |
| Tm     | 0.01 | 0.01 |        | 0.04   | 0.04   | 0.01   | 0.01   | b.d.   | 0.05   | 0.05   | 0.07   | 0.01   | 0.01   | 0.02   | 0.01   | 0.01   |      | 0.01  | 0.01  | 0.03  | 0.09   | 0.07   | 0.02   | 0.02  | 0.05   | 0.01   | 0.01   | 0.06   | b.d.   | 0.03  |      |      |  |      |  |      |  |      |  |
| Yb     | 0.04 | 0.06 |        | 0.22   | 0.21   | 0.05   | 0.07   | 0.05   | 0.24   | 0.27   | 0.35   | 0.03   | 0.04   | 0.04   | 0.06   | 0.04   |      | 0.04  | 0.04  | 0.14  | 0.46   | 0.31   | 0.09   | 0.08  | 0.19   | 0.07   | 0.05   | 0.27   | b.d.   | 0.15  |      |      |  |      |  |      |  |      |  |
| Lu     | b.d. | 0.01 |        | 0.03   | 0.03   | b.d.   | 0.01   | b.d.   | 0.03   | 0.03   | 0.04   | 0.00   | 0.01   | b.d.   | 0.01   | 0.01   |      | 0.01  | 0.00  | 0.02  | 0.05   | 0.04   | 0.01   | 0.02  | 0.02   | 0.01   | 0.01   | 0.03   | 0.01   | 0.02  |      |      |  |      |  |      |  |      |  |
| Hf     | 0.10 | 0.11 |        | 1.05   | 1.11   | 0.49   | 0.59   | 0.49   | 1.18   | 1.08   | 1.38   | 0.16   | 0.14   | 0.32   | 0.30   | 0.49   |      | 0.25  | 0.28  | 0.39  | 1.37   | 1.44   | 2.48   | 2.29  | 1.12   | 0.36   | 0.37   | 1.16   | 0.58   | 0.45  |      |      |  |      |  |      |  |      |  |
| Ta     | b.d. | 0.01 |        | 0.01   | 0.01   | 0.03   | 0.02   | 0.02   | 0.02   | 0.02   | 0.02   | 0.09   | 0.11   | 0.02   | 0.03   | 0.02   |      | 0.00  | b.d.  | b.d.  | 0.01   | 0.01   | 0.03   | 0.05  | 0.01   | 0.01   | 0.01   | 0.01   | 0.14   | 0.10  |      |      |  |      |  |      |  |      |  |
| Pb     | b.d. | 0.11 |        | 1.25   | 1.32   | 0.50   | 0.52   | 0.45   | 0.75   | 0.69   | 0.29   | 0.40   | 0.38   | 0.22   | 0.22   | 0.19   |      | 0.09  | 0.15  | 0.13  | 0.79   | 0.80   | 0.35   | 0.51  | 1.02   | 0.48   | 0.44   | 1.21   | 0.20   | 0.48  |      |      |  |      |  |      |  |      |  |
| Th     | 0.01 | 0.01 |        | 0.90   | 0.84   | 0.22   | 0.22   | 0.24   | 0.71   | 0.72   | 0.63   | 0.53   | 0.51   | 0.29   | 0.31   | 0.24   |      | 0.10  | 0.11  | 0.17  | 0.85   | 0.77   | 0.60   | 0.82  | 0.49   | 0.73   | 0.64   | 0.90   | 0.29   | 0.61  |      |      |  |      |  |      |  |      |  |
| U      | b.d. | 0.01 |        | 0.18   | 0.16   | 0.06   | 0.04   | 0.06   | 0.17   | 0.19   | 0.15   | 0.14   | 0.13   | 0.07   | 0.07   | 0.06   |      | 0.02  | 0.02  | 0.03  | 0.13   | 0.12   | 0.15   | 0.19  | 0.06   | 0.17   | 0.14   | 0.16   | 0.06   | 0.13  |      |      |  |      |  |      |  |      |  |

Note: H, host Cpx; M, recrystallized Cpx; Inc, Cpx inclusions in coarse Gt grains.

b.d.= below detection limit.
